# Supplementary material for: Beaded stream-like CoSe2 nanoneedle array for efficient hydrogen evolution electrocatalysis
Source: Royal Society of Chemistry journal article supplement (doi:10.1039/c6ta00464d), 2016-01-01
Supplement: c6ta00464d1.pdf [file c6ta00464d1.pdf]

Electronic Supplementary Information

**Beaded-Stream-like CoSe<sub>2</sub> Nanoneedles Array for Efficient  
Hydrogen Evolution Electrocatalysis**

Chuan-Pei Lee,<sup>a</sup> Wei-Fu Chen,<sup>\*a</sup> Tadesse Billo,<sup>bcd</sup> Yan-Gu Lin,<sup>e</sup> Fang-Yu Fu,<sup>af</sup>  
Satya•N Samireddi,<sup>bgh</sup> Chih-Hao Lee,<sup>d</sup> Jih-Shang Hwang,<sup>f</sup> Kuei-Hsien Chen<sup>\*ab</sup> and  
Li-Chyong Chen<sup>\*a</sup>

<sup>a</sup> Center for Condensed Matter Sciences, National Taiwan University, Taipei 10617, Taiwan

<sup>b</sup> Institute of Atomic and Molecular Sciences, Academia Sinica, Taipei 10617, Taiwan

<sup>c</sup> Nano Science and Technology Program, Taiwan International Graduate Program, Academia Sinica, Taipei 11529, Taiwan

<sup>d</sup> Engineering and System Science, National Tsing Hua University, Hsinchu 30012, Taiwan

<sup>e</sup> National Synchrotron Radiation Research Center, Hsinchu, 30076, Taiwan

<sup>f</sup> Institute of Optoelectronic Science, National Taiwan Ocean University, Keelung 202, Taiwan

<sup>g</sup> Molecular Science and Technology Program, Taiwan International Graduate Program, Academia Sinica, Taipei 11529, Taiwan

<sup>h</sup> Department of Chemistry, National Tsing Hua University, Hsinchu 30012, Taiwan.

\*Corresponding author: Tel: +886-2-33665200; Fax: +886-2-2365-5404

E-mail: [wfchen@ntu.edu.tw](mailto:wfchen@ntu.edu.tw)

E-mail: [chenkh@pub.iams.sinica.edu.tw](mailto:chenkh@pub.iams.sinica.edu.tw)

E-mail: [chenlc@ntu.edu.tw](mailto:chenlc@ntu.edu.tw)

**Table S1.** Comparison of overpotential, mass activity and charge transfer resistance of cobalt selenide catalysts and reported non-precious metal catalysts in acid electrolyte.

| Catalysts                   | $\eta_{20}$<br>(mV) <sup>a</sup> | $j_0$<br>(mA cm <sup>-2</sup> ) <sup>b</sup> | $j@ \eta=150$ mV<br>(mA cm <sup>-2</sup> ) <sup>c</sup> | Loading<br>(mg cm <sup>-2</sup> ) | Mass activity<br>@ $\eta=150$ mV<br>(mA mg <sup>-1</sup> ) | $R_{ct}$<br>( $\Omega$ ) | ref       |
|-----------------------------|----------------------------------|----------------------------------------------|---------------------------------------------------------|-----------------------------------|------------------------------------------------------------|--------------------------|-----------|
| CoSe <sub>2</sub> -BSND     | 125                              | 4.3×10 <sup>-2</sup>                         | 35.0                                                    | 1.60                              | 21.90                                                      | 74 @ $\eta=150$ mV       | this work |
| CoSe <sub>2</sub> -PA       | 220                              | 5.2×10 <sup>-3</sup>                         | 1.40                                                    | 1.50                              | 0.93                                                       | 310@ $\eta=150$ mV       | this work |
| Co-BSND                     | 325                              | 2.1×10 <sup>-3</sup>                         | 0.13                                                    | 0.45                              | 0.29                                                       | --                       | this work |
| MoS <sub>2</sub> /RGO       | 140                              | N.A.                                         | 10.00                                                   | 1.00                              | 10.00                                                      | 250@ $\eta=120$ mV       | 28        |
| Mo <sub>2</sub> C nanowires | 150                              | N.A.                                         | 20.00                                                   | 0.21                              | 95.20                                                      | 90@ $\eta=150$ mV        | 29        |

  

|                                                  | $\eta$ @current density       | $j_0$<br>(mA cm <sup>-2</sup> ) <sup>b</sup> | Loading<br>(mg cm <sup>-2</sup> ) | Tafel slop<br>(mV dec <sup>-1</sup> ) | $R_{ct}$<br>( $\Omega$ ) | Ref             |
|--------------------------------------------------|-------------------------------|----------------------------------------------|-----------------------------------|---------------------------------------|--------------------------|-----------------|
| MoS <sub>2</sub> nanosheets                      | 190 mV@10 mA cm <sup>-2</sup> | 3.89 × 10 <sup>-2</sup>                      | 0.285                             | 68.0                                  | N.A.                     | S1 <sup>d</sup> |
| Vertically aligned MoSe <sub>2</sub> layers      | 450 mV@8 mA cm <sup>-2</sup>  | 2.0 × 10 <sup>-3</sup>                       | 0.135                             | 108.0                                 | N.A.                     | S2 <sup>d</sup> |
| CoSe <sub>2</sub> nanoparticles on carbon fiber  | 137 mV@10 mA cm <sup>-2</sup> | 4.9 × 10 <sup>-3</sup>                       | 2.8                               | 42.1                                  | N.A.                     | 23              |
| CoSe <sub>2</sub> nanoparticles on Ti foil       | 135 mV@10 mA cm <sup>-2</sup> | 6.4 × 10 <sup>-2</sup>                       | 3.0                               | 62.0                                  | N.A.                     | 26              |
| CoSe <sub>2</sub> nanoparticles on graphite disk | 193 mV@10 mA cm <sup>-2</sup> | N.A.                                         | 2.8                               | 42.2                                  | 8.8@ $\eta=240$ mV       | S3 <sup>d</sup> |
| CoS <sub>2</sub> nanosheets/RGO-CNT              | 153 mV@20 mA cm <sup>-2</sup> | 6.26× 10 <sup>-2</sup>                       | 1.15                              | 51.0                                  | N.A.                     | S4 <sup>d</sup> |
| CoS <sub>2</sub> thin film                       | 192 mV@10 mA cm <sup>-2</sup> | 3.53 × 10 <sup>-3</sup>                      | N.A.                              | 52.0                                  | N.A.                     | S5 <sup>d</sup> |

<sup>a</sup> The overpotential for driving a current density at 20 mA cm<sup>-2</sup>. <sup>b</sup> The exchange current density. <sup>c</sup> The cathodic current density at fixed overpotential of 150 mV.

<sup>d</sup> Reference:

S1. Z. Zeng, C. Tan, X. Huang, S. Bao, H. Zhang *ACS Catal.*, **2013**, *3*, 2101-2107.

S2. D. Kong, H. Wang, J. J. Cha, M. Pasta, K. J. Koski, J. Yao, Y. Cui *Nano Lett.*, **2013**, *13*, 1341–1347.

S3. H. Zhang, L. Leiab, X. Zhang *RSC Adv.*, **2014**, *4*, 54344-54348.

S4. S. Peng et al. *Angew. Chem. Int. Ed.*, **2014**, *53*, 12594-12599.

S5. M. S. Faber, M. A. Lukowski, Q. Ding, N. S. Kaiser, S. Jin *J. Phys. Chem. C*, **2014**, *118*, 21347-21356.

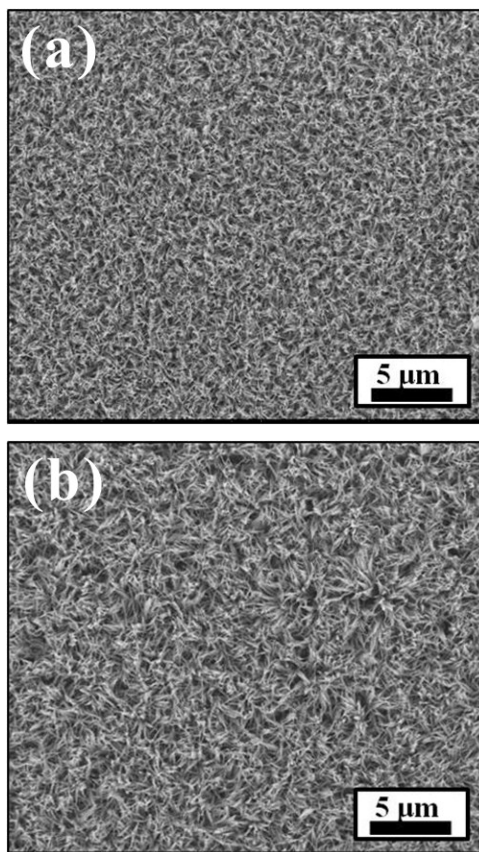

**Fig. S1** SEM images of (a) Co<sub>3</sub>O<sub>4</sub> and (b) CoSe<sub>2</sub> nanoneedle arrays taken at a magnification of 5,000x.

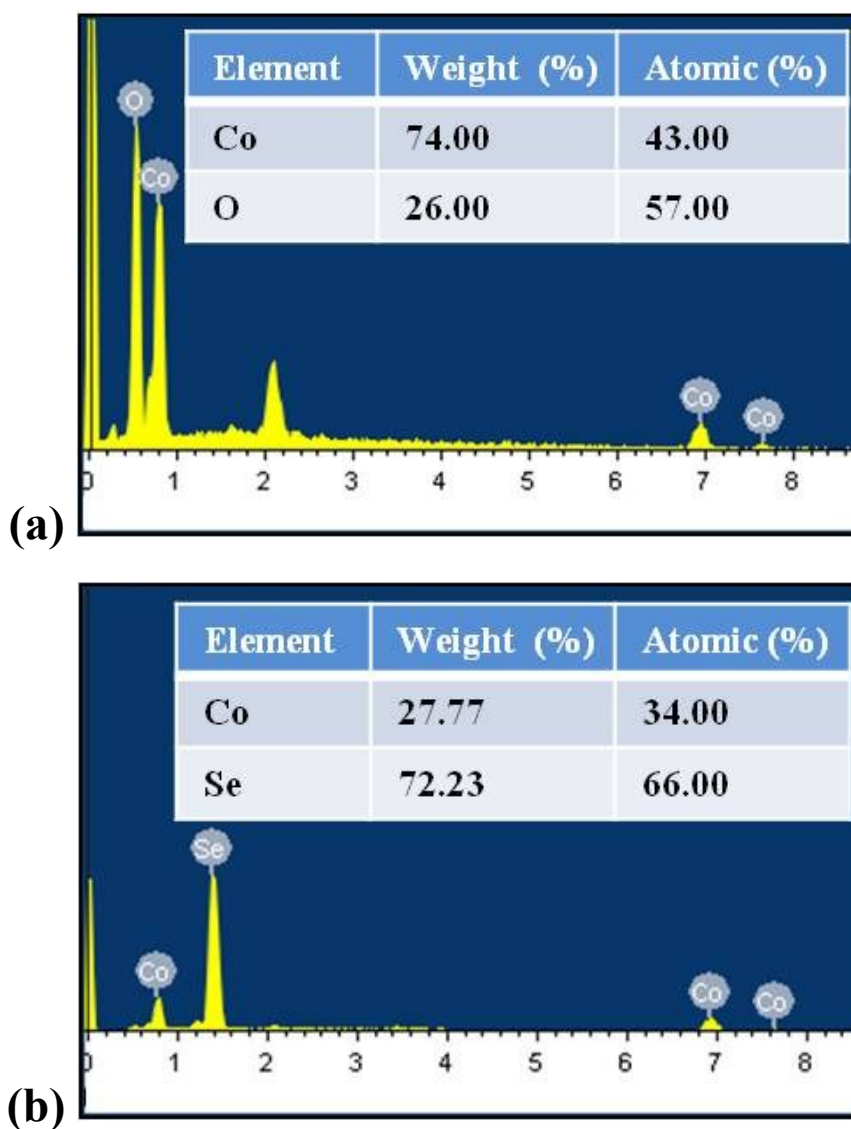

**Fig. S2** Energy-dispersive X-ray spectra of (a) Co<sub>3</sub>O<sub>4</sub> nanoneedles (Co<sub>3</sub>O<sub>4</sub>-ND) array and (b) CoSe<sub>2</sub> beaded-stream-like nanoneedles (CoSe<sub>2</sub>-BSND) array.

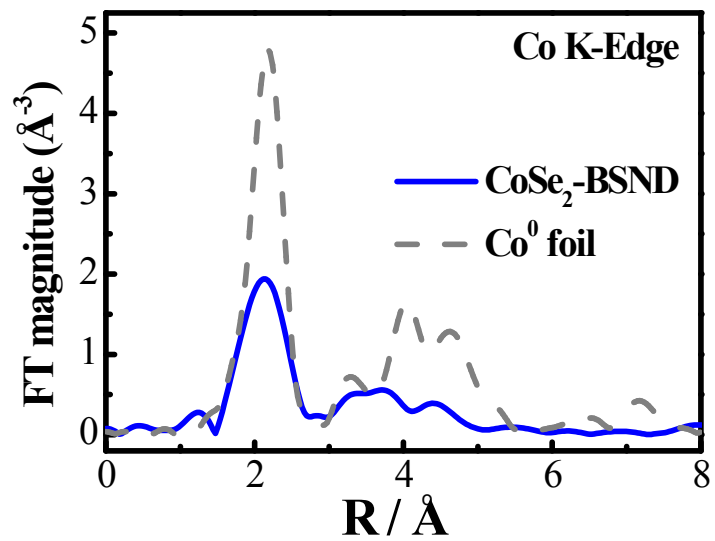

**Fig. S3** Fourier transformed magnitudes of the  $k^2$ -weighted Co K-edge EXAFS data for CoSe<sub>2</sub>-BSND and the Co foil ( $k$ =the photoelectron wavenumber).

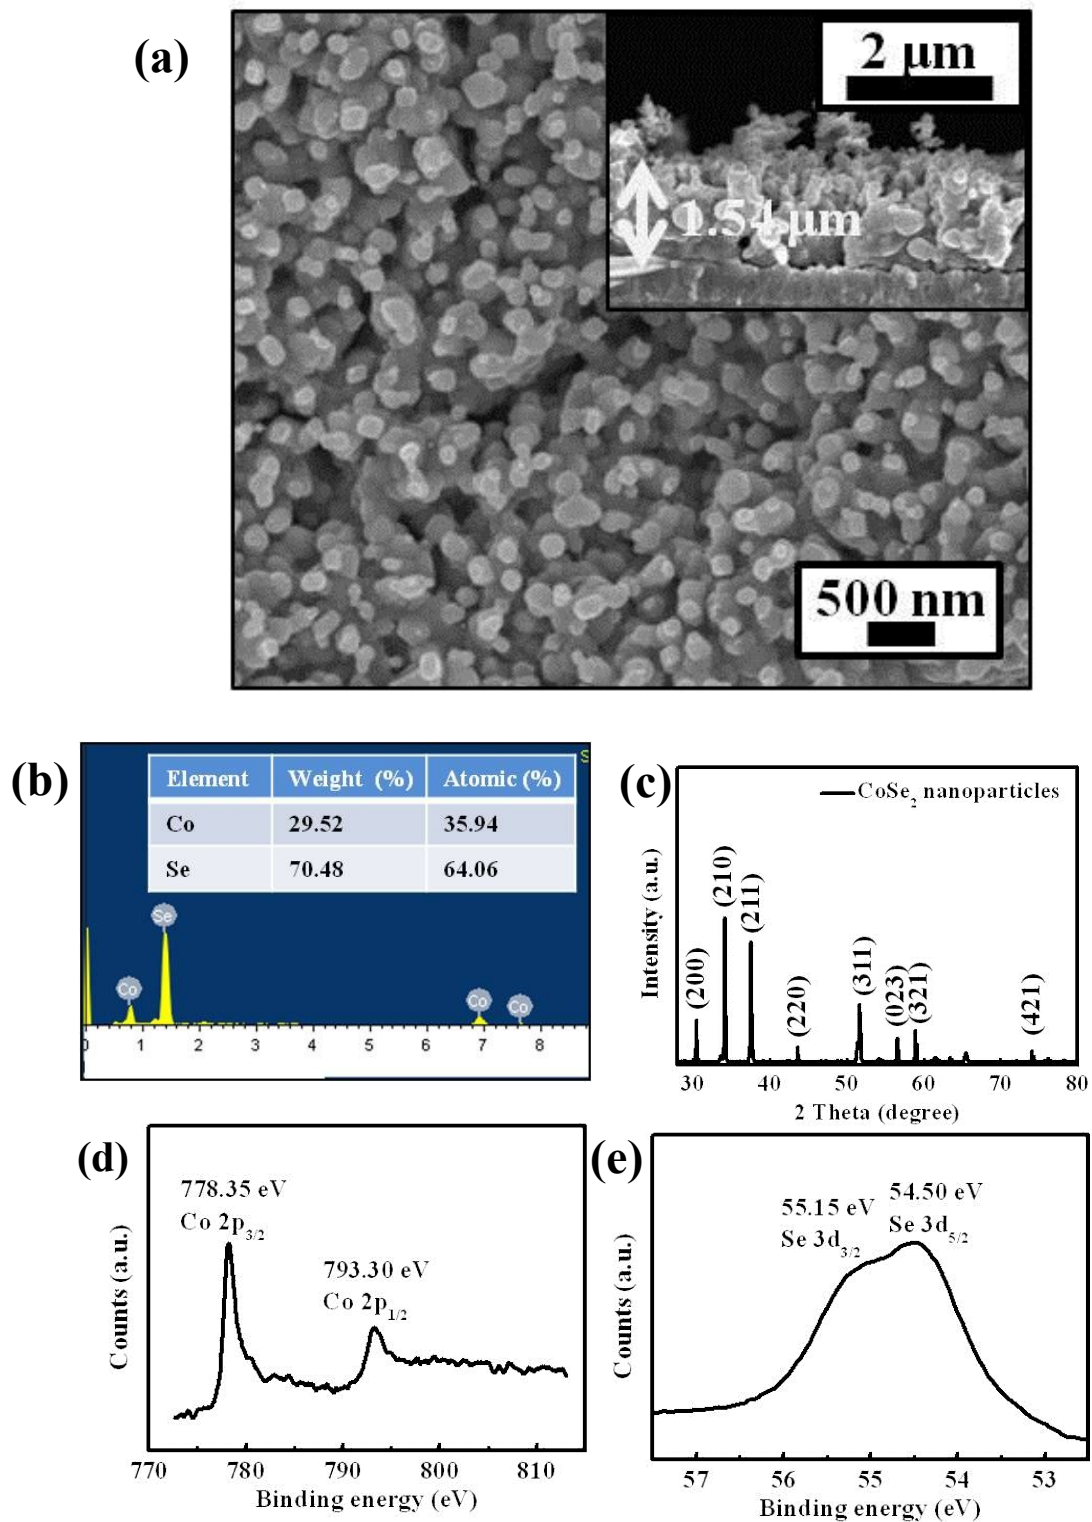

**Fig. S4** (a) The SEM image, (b) EDX spectra, (c) XRD pattern and XPS spectra of (d) Co 2p and (e) Se 3d region of CoSe<sub>2</sub> particles (CoSe<sub>2</sub>-PA) film prepared by using cobalt sulfate heptahydrate as the precursor.

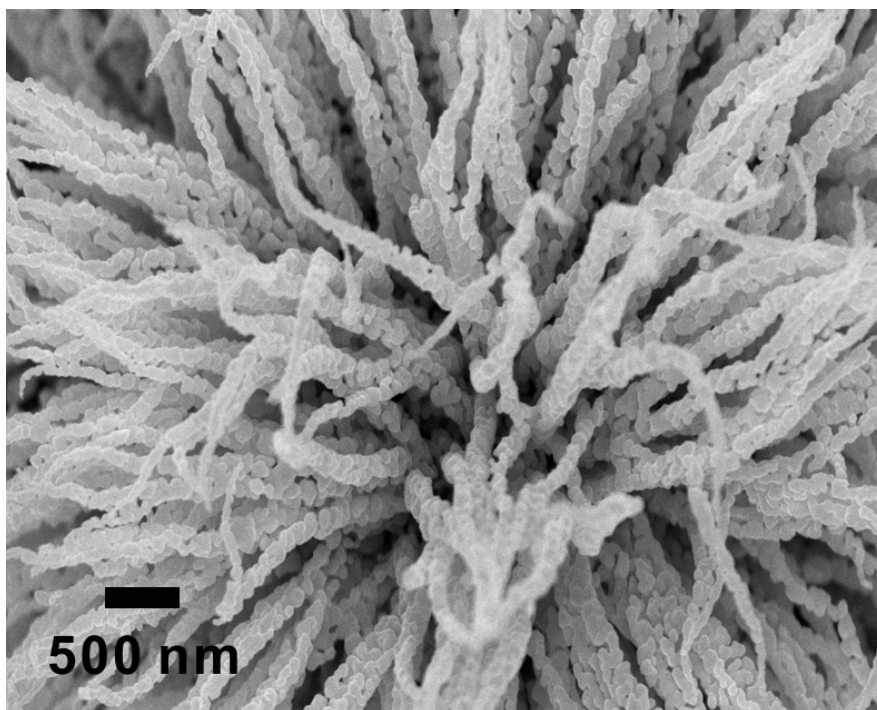

**Fig. S5** The SEM image of beaded stream-like nanoneedle Co (Co-BSND) array formed by treating the  $\text{Co}_3\text{O}_4$ -ND template under  $\text{H}_2$  at 400 °C.

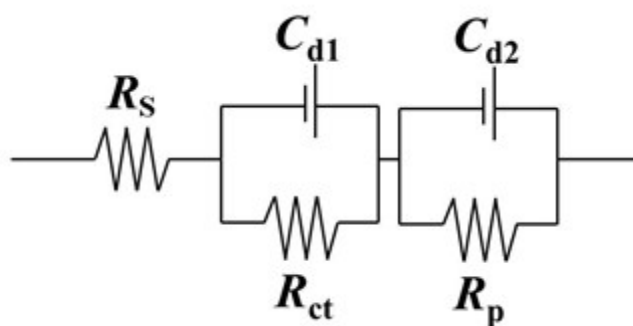

**Fig. S6** Two-time constant equivalent circuit models for fitting the EIS response of hydrogen evolution reaction on  $\text{CoSe}_2$  electrodes, where  $R_s$  is the series resistance,  $R_{ct}$  is the charge transfer resistance,  $R_p$  related to the porosity of the electrode surface, and the double layer capacitance is represented by the elements  $C_{d1}$  and  $C_{d2}$ . Here  $R_s$  contains components arising from the resistance in the wiring ( $R_{\text{wiring}}$ ), the resistance of the Ti foil ( $R_{\text{cp}}$ ), the resistance of cobalt selenide ( $R_{\text{CoSe}}$ ), the resistance between the interface of  $\text{CoSe}_2$  and Ti foil ( $R_{\text{int}}$ ), and the solution resistance ( $R_{\text{soln}}$ ).



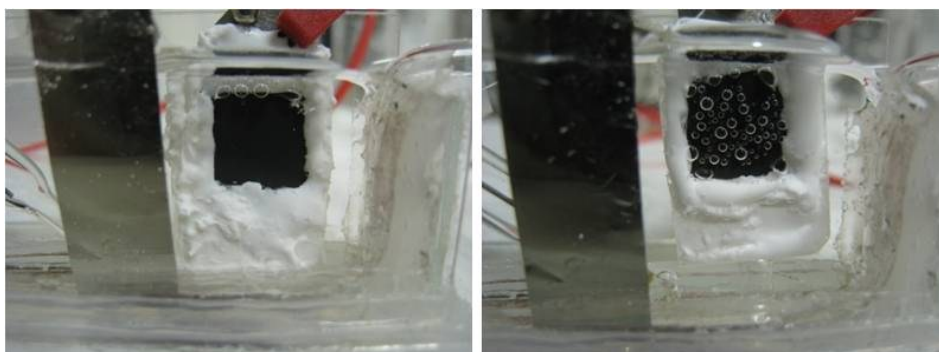

**Fig. S7** Optical images depicting the H<sub>2</sub> bubbles pinning level on the surfaces of CoSe<sub>2</sub>-BSND (left) and CoSe<sub>2</sub>-PA (right) electrodes after electrolysis.

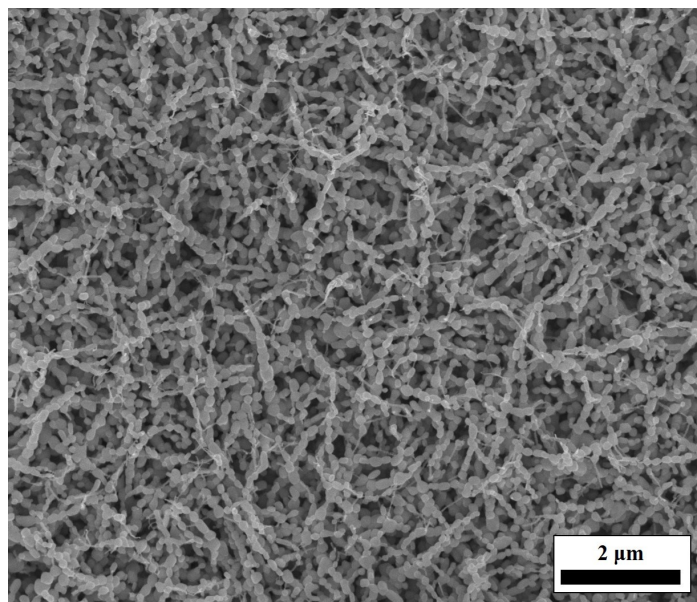

**Fig. S8** A SEM micrograph of CoSe<sub>2</sub>-BSND electrode after the durability test for 18h.
